# Supplementary material
Source: PubMed Central journal article supplement (PMC3281525)

**A**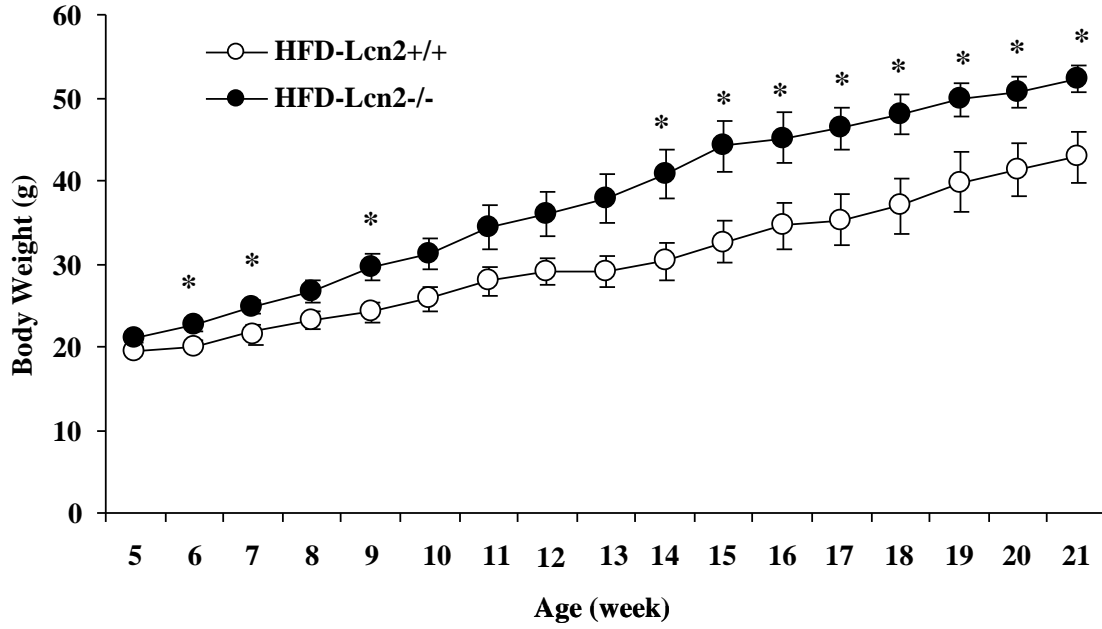**B**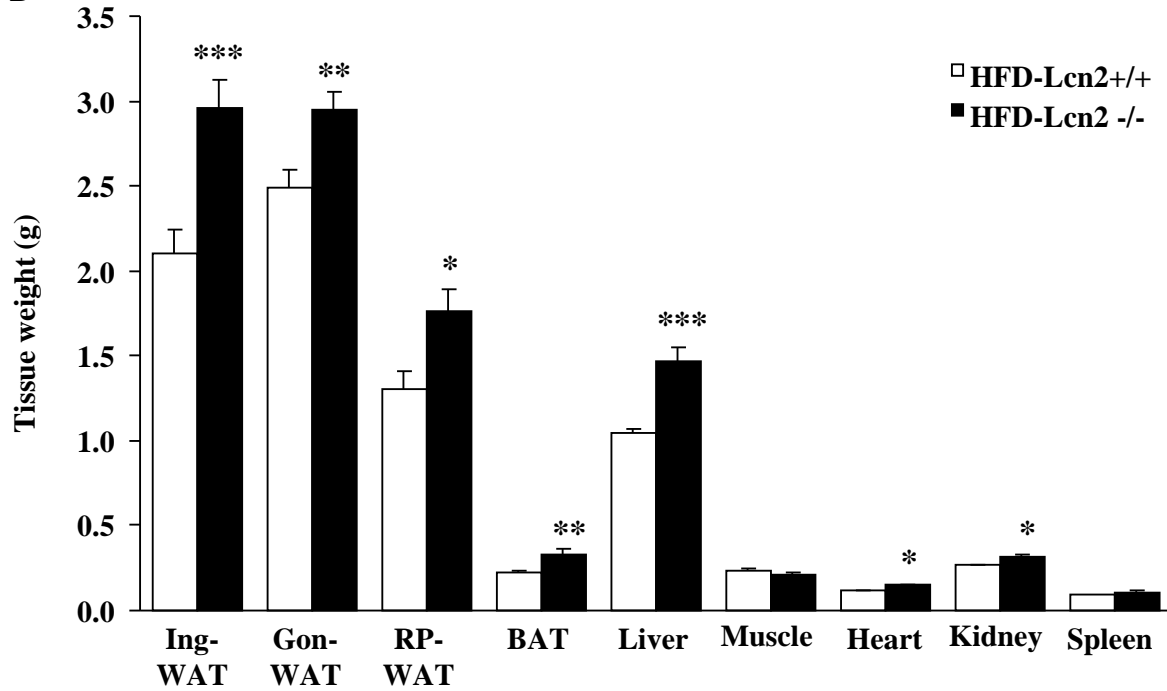**Figure s1**

Supplement: supp_en.2011-1642_EN-11-1642-Figure-S1_source_files.pdf [file supp_en.2011-1642_EN-11-1642-Figure-S1_source_files.pdf]
